# Supplementary material
Source: PubMed Central journal article supplement (PMC3026907)

**Figure S-1. Cell viability as a function of polymer concentration and charge ratio (+/-)**

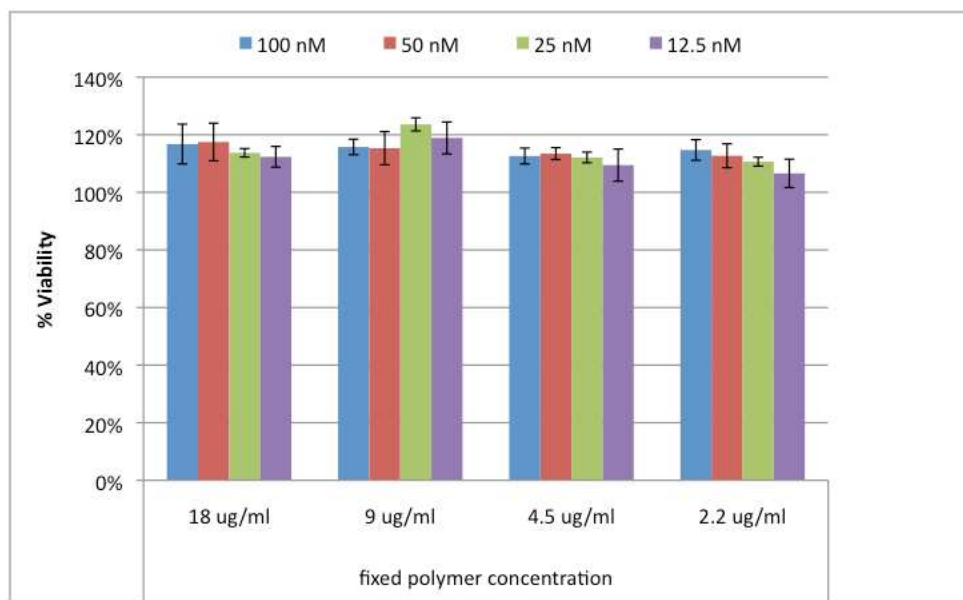

Cytotoxicity of diblock copolymer and siRNA/polymer complex was determined by assaying for cell metabolic activity. HeLa cells were seeded in 96-well plates at a density of 8000 cells/cm<sup>2</sup> and allowed to adhere overnight. Complexes were formed by the addition of polymer (0.1 mg/mL stock solutions) to GAPDH siRNA (50  $\mu$ M) to attain a concentration of 25 nM siRNA/well (100  $\mu$ L volume). Complexes were added to wells in triplicate. After cells had been incubated for 24 h with the polymer/complexes, 10ul of Cell Titer Blue (Promega, Madison WI) reagent was added to each well. The cells were incubated at 37C for 120 min for color formation, the fluorescence (560/590nm) was determined according to the manufacturer's instructions. Percent viability is expressed as function of 1% Triton X-100 treated cells (control for 0% viability).

**Figure S-2. Critical micelle concentration (CMC) determination via pyrene fluorescence**

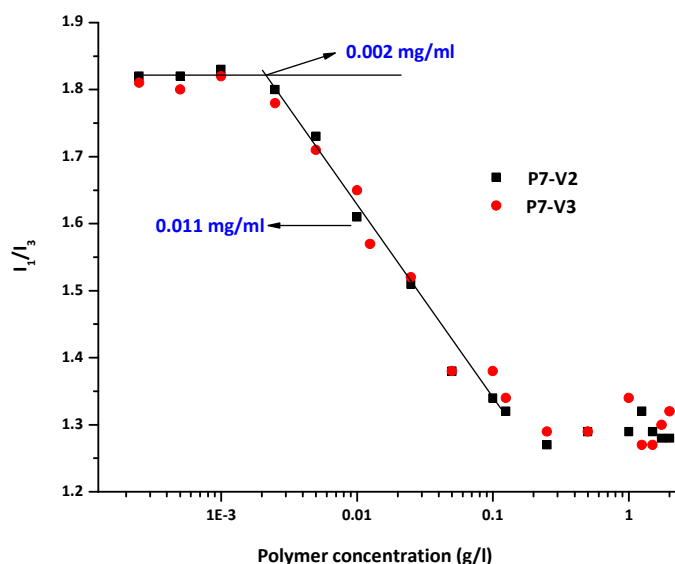

The formation of polymer micelles with or without siRNA was confirmed by a fluorescence probe technique using pyrene ( $\text{C}_{16}\text{H}_{10}$ , MW = 202), in which the partitioning of pyrene into the micelle core was determined using the ratio of 2 emission maxima of the pyrene spectrum. The fluorescence emission spectrum of pyrene in the polymer micelle solution was measured from 300 to 360 nm using a fixed excitation wavelength of 395 nm with a constant pyrene concentration of  $6 \times 10^{-7}$  M. The polymer was varied from 0.001% to 20% (w/w) with or without 100 nM siRNA. The spectral data were acquired using a Varian fluorescence spectrophotometer. All fluorescence experiments are carried out at 25°C. The critical micelle concentration (CMC) was determined by plotting the intensity ratio  $I_{336}/I_{333}$  as a function of polymer concentration. CMC values were calculated from the low concentration break point to be approximately 2  $\mu\text{g/ml}$  (see Figure S-1 in Supporting Information).

**Figure S-3. pH dependence of the critical micelle concentration (CMC) determined by DLS dilution method**

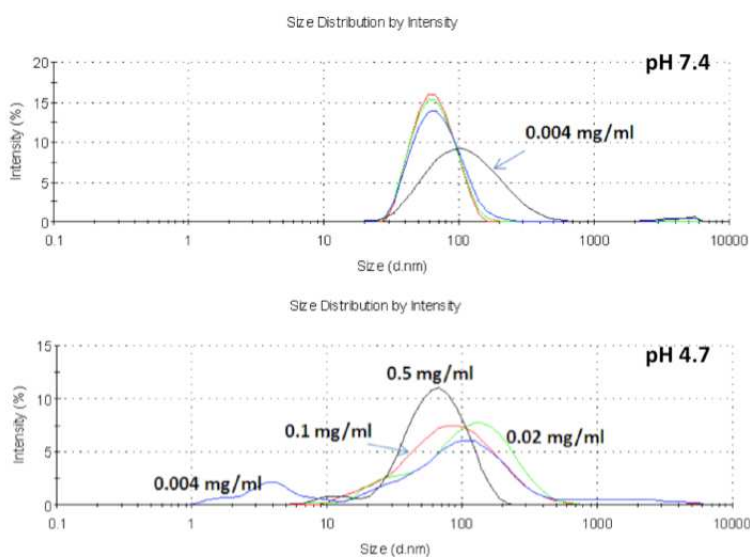

*Dynamic light scattering assay.* The stability of polymer micelles to incremental dilution was measured by dynamic light scattering (DLS). Particle size was measured by DLS over a 5-fold range of serial dilutions with PBS buffer from 1 mg/ml to 1.6 ug/ml. Particle sizes of about 45 nm were stable down to a concentration of about 10ug/ml with instability below about 5 ug/ml (the CMC) where individual polymer chains appear to form higher MW polydisperse aggregates and lower particle sizes including monomer chains

**Figure S-4:  $^1\text{H}$  NMR Analysis of pDMAEMA and diblock copolymers**

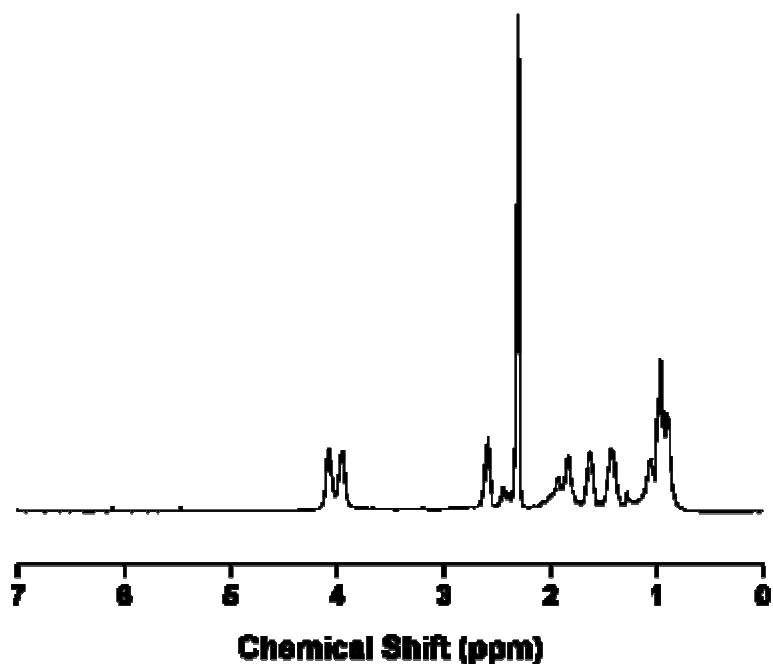

polyDMAEMA and the diblock copolymers were dissolved in  $\text{D}_2\text{O}$  or  $\text{CDCl}_3$  at 3 wt%, respectively, and NMR spectroscopy performed on a Bruker 499 DRX. Diblock copolymer composition is determined from the using resonances associated with the DMAEMA methylene ( $\delta = 2.5 - 2.68$ ) methylene, the combined ester methylenes ( $\delta = 3.83 - 4.2$ ), and the entire backbone region ( $\delta = 0.7 - 2.1$ ). By also utilizing the  $M_n$  of the pDMAEMA and diblock copolymers, determined from GPC, the relative moles monomer for the diblock components (DMAEMA, butyl methacrylate, and propylacrylic acid, nD, nB, nP, respectively) can be calculated.

Figure S-5. Size Exclusion Chromatography (SEC) for the poly(DMAEMA) macrocCTA and the corresponding diblock copolymer

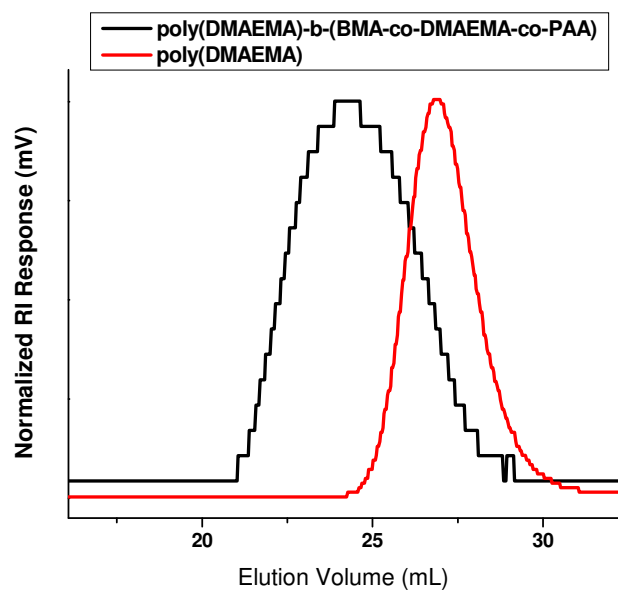

Supplement: NIHMS242036-supplement-1_si_001.pdf [file NIHMS242036-supplement-1_si_001.pdf]
